# Supplementary material for: Transient metabolon dynamics tune enzyme specificity
Source: Research Square preprint supplement (doi:10.21203/rs.3.rs-7450846/v1), 2025-09-23
Supplement: Supplementary file 1 [file 0571df9ab3ab368e44055c1b.pdf]

## **Supplementary information**

### **Transient metabolon dynamics tune enzyme specificity**

Riki Imaizumi, Toshiyuki Waki, Yoshikazu Hattori, Kohei Takeshita, Miru Sumita, Kazutomo Kawaguchi, Hiroyuki Kumeta, Kenichi Umeda, Kyohei Sato, Taro Yanai, Hiroaki Matsuura, Takeshi Yokoyama, Risa Omura, Kayo Nakatani, Naoki Sakai, Yukimura Kawagiwa, Yamato Doi, Aoi Yasuda, Takuya Nakano, Kaichi Uno, Kunihiro Yoshida, Misato Tsunashima, Tomohide Saio, Yoshikazu Tanaka, Seiji Takahashi, Noriyuki Kodera, Kunishige Kataoka, Masaki Yamamoto, Satoshi Yamashita and Toru Nakayama

Corresponding authors: [yamashita@se.kanazawa-u.ac.jp](mailto:yamashita@se.kanazawa-u.ac.jp), [toru.nakayama.e5@tohoku.ac.jp](mailto:toru.nakayama.e5@tohoku.ac.jp)

## Supplementary Figures

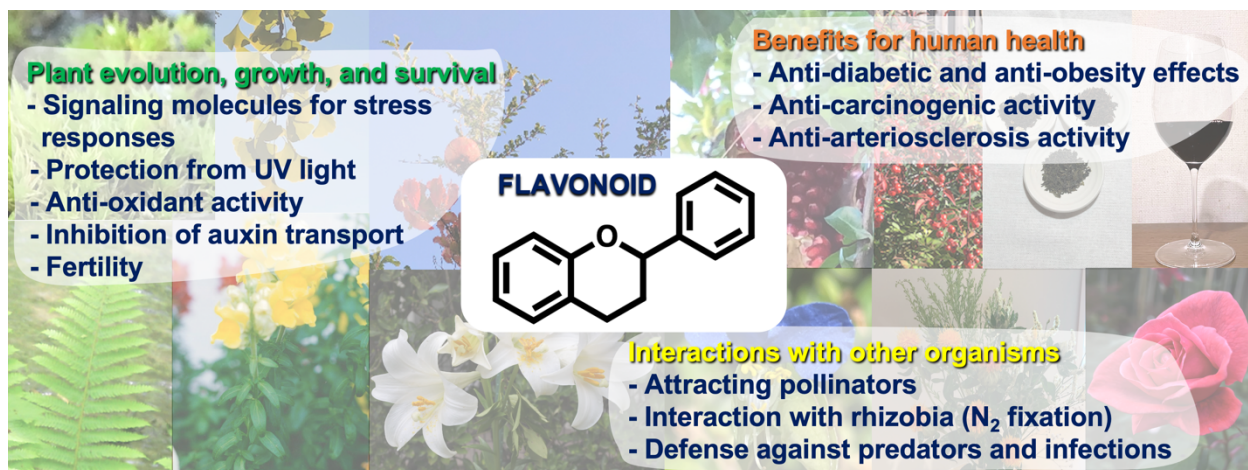

Supplementary Fig. 1. General structure of flavonoids, with the roles of flavonoids in plant growth and survival, interactions with other organisms, and health benefits in humans shown around the structure.

**A** *A. thaliana* (Brassicales)

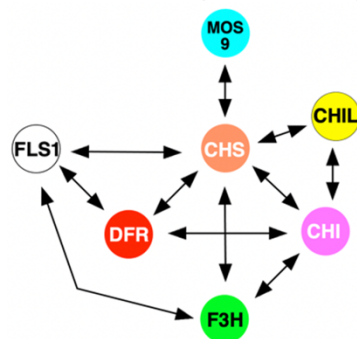

**B** *G. max* (Fabales)

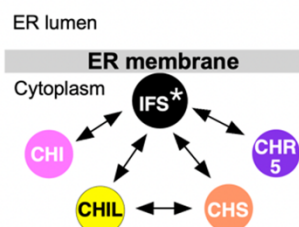

**C** *A. majus* (Lamiales)

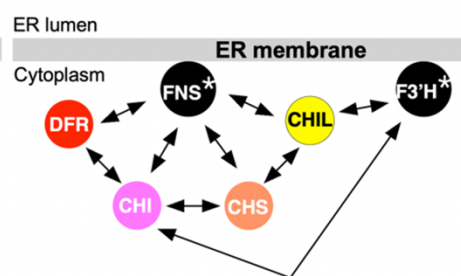

**Supplementary Fig. 2. Examples of flavonoid metabolons, with identified protein–protein interactions indicated by double-headed arrows.** (A) *Arabidopsis thaliana*<sup>11,19,20,62</sup>. (B) *Glycine max*<sup>11,32,33</sup>. (C) *Antirrhinum majus*<sup>11,31</sup>. Enzyme and protein names are as follows: CHS, chalcone synthase; CHI, chalcone isomerase; CHIL, chalcone isomerase-like protein; CHR5, chalcone reductase isozyme 5; DFR, dihydroflavonol 4-reductase; F3H, flavanone 3-hydroxyase; FLS1, flavonol synthase isozyme 1; IFS, 2-hydroxyisoflavanone synthase; F3'H, flavonoid 3'-hydroxylase; MOS9, nuclear protein associated with the epigenetic control of *R* genes that mediate effector-triggered immunity. Enzymes with an asterisk are ER membrane-bound cytochromes P450.

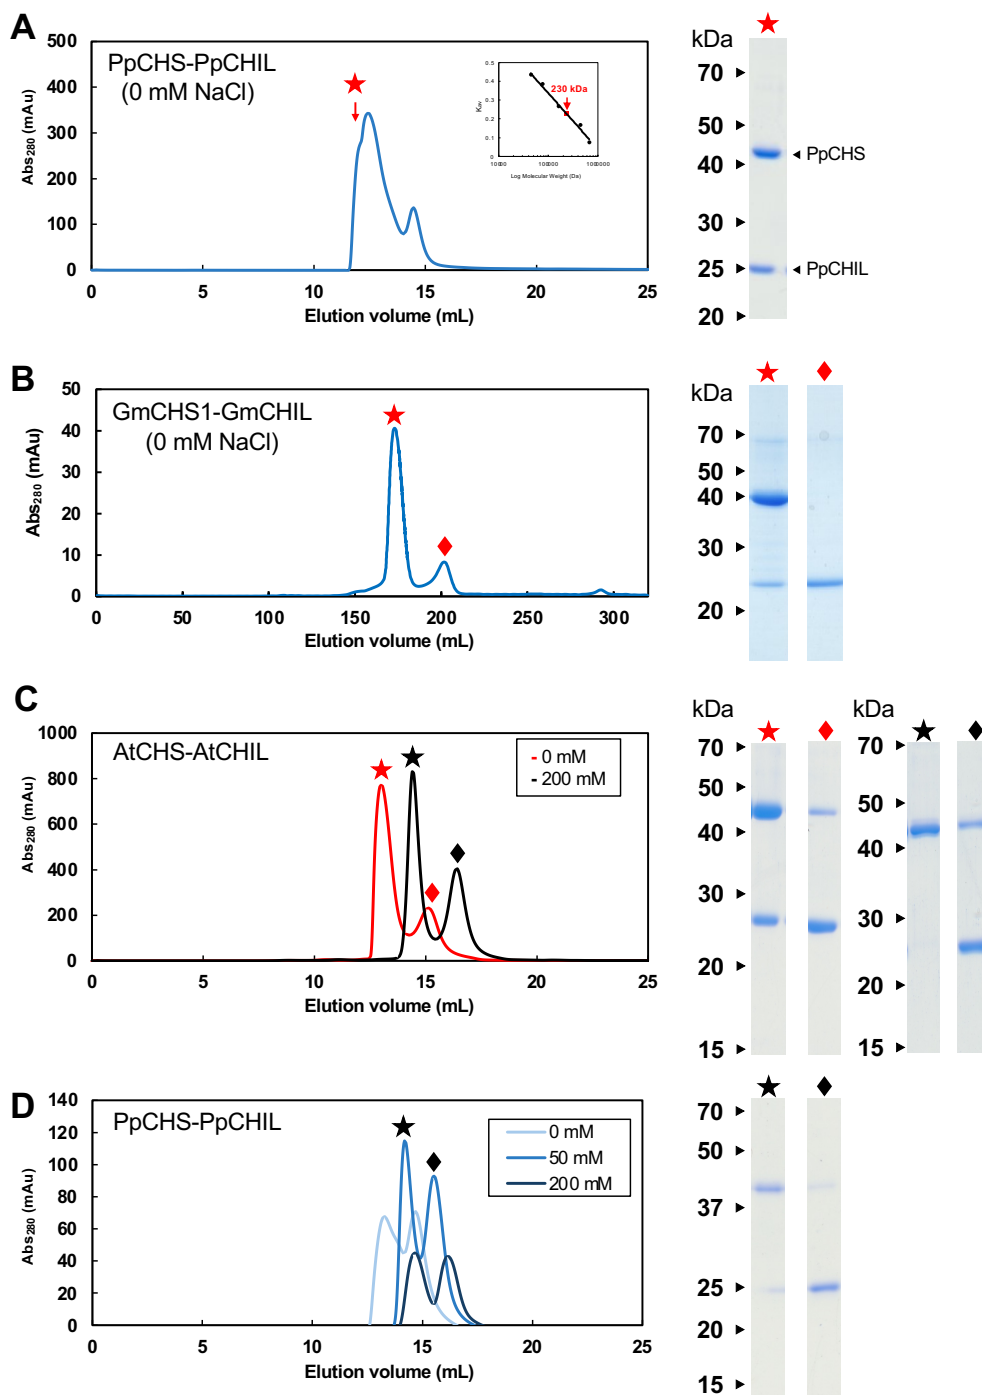

**Supplementary Fig. 3. Size-exclusion chromatograms of CHS-CHIL complexes from various plants.** (A) Size-exclusion chromatography of the PpCHS-PpCHIL complex. The fraction indicated by a star in the chromatogram was analyzed by SDS-PAGE (right) and used for crystallization. (B) Chromatogram of an equimolar mixture of *Glycine max* CHS and CHIL (GmCHS1 and GmCHIL, respectively) analyzed using a Hiloal 26/60 Superdex 200 pg column in 50 mM Tris-HCl (pH 7.5). Symbols in the chromatogram correspond to the symbols for the SDS-PAGE results shown on the right. (C) Chromatogram of an equimolar mixture of

*Arabidopsis thaliana* CHS and CHIL (AtCHS and AtCHIL, respectively) analyzed using a Superdex 200 Increase 15/300 column in 50 mM Tris-HCl (pH 7.5) with 200 mM NaCl (black line) or without NaCl (red line). (D) Chromatogram of an equimolar mixture of PpCHS and PpCHIL analyzed using a Superdex 200 Increase 15/300 column in 50 mM Tris-HCl (pH 7.5) with 50 mM NaCl or 200 mM NaCl or without NaCl. SDS-PAGE results for the peaks under 50 mM NaCl conditions (black symbols) are shown on the right.

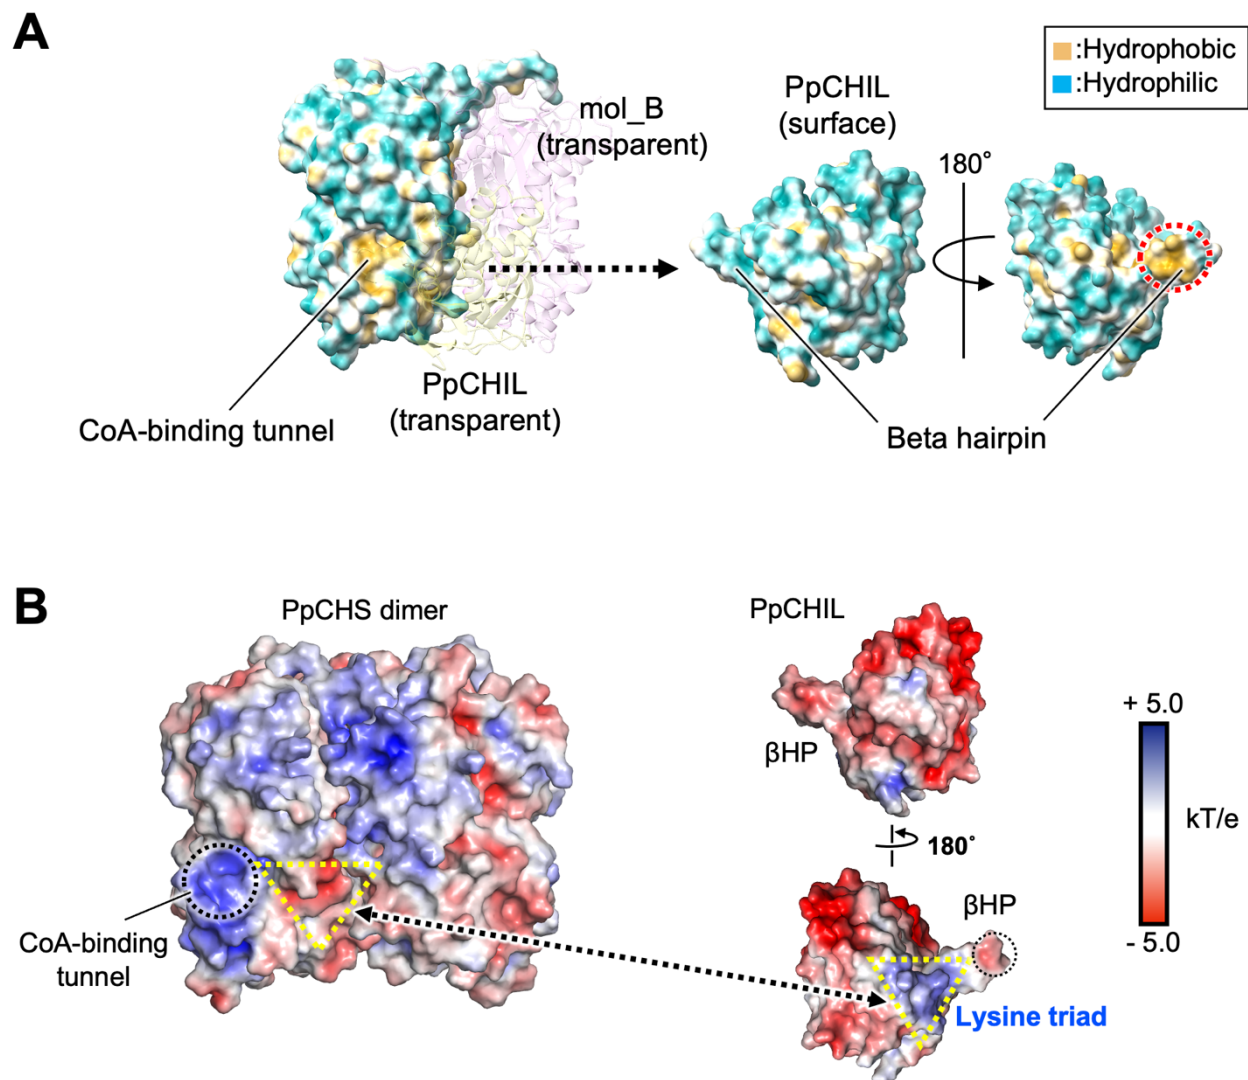

**Supplementary Fig. 4. Interactions involved in the formation of the PpCHS-CHIL complex.** (A) Hydrophobic interactions between PpCHS and PpCHIL around the CoA-binding tunnel of PpCHS and  $\beta$ HP of PpCHIL. (B) Electrostatic surfaces of PpCHS and PpCHIL. Dotted circles (black) and triangles (yellow) on both protein molecules indicate putative pairs of interactions in the interface.

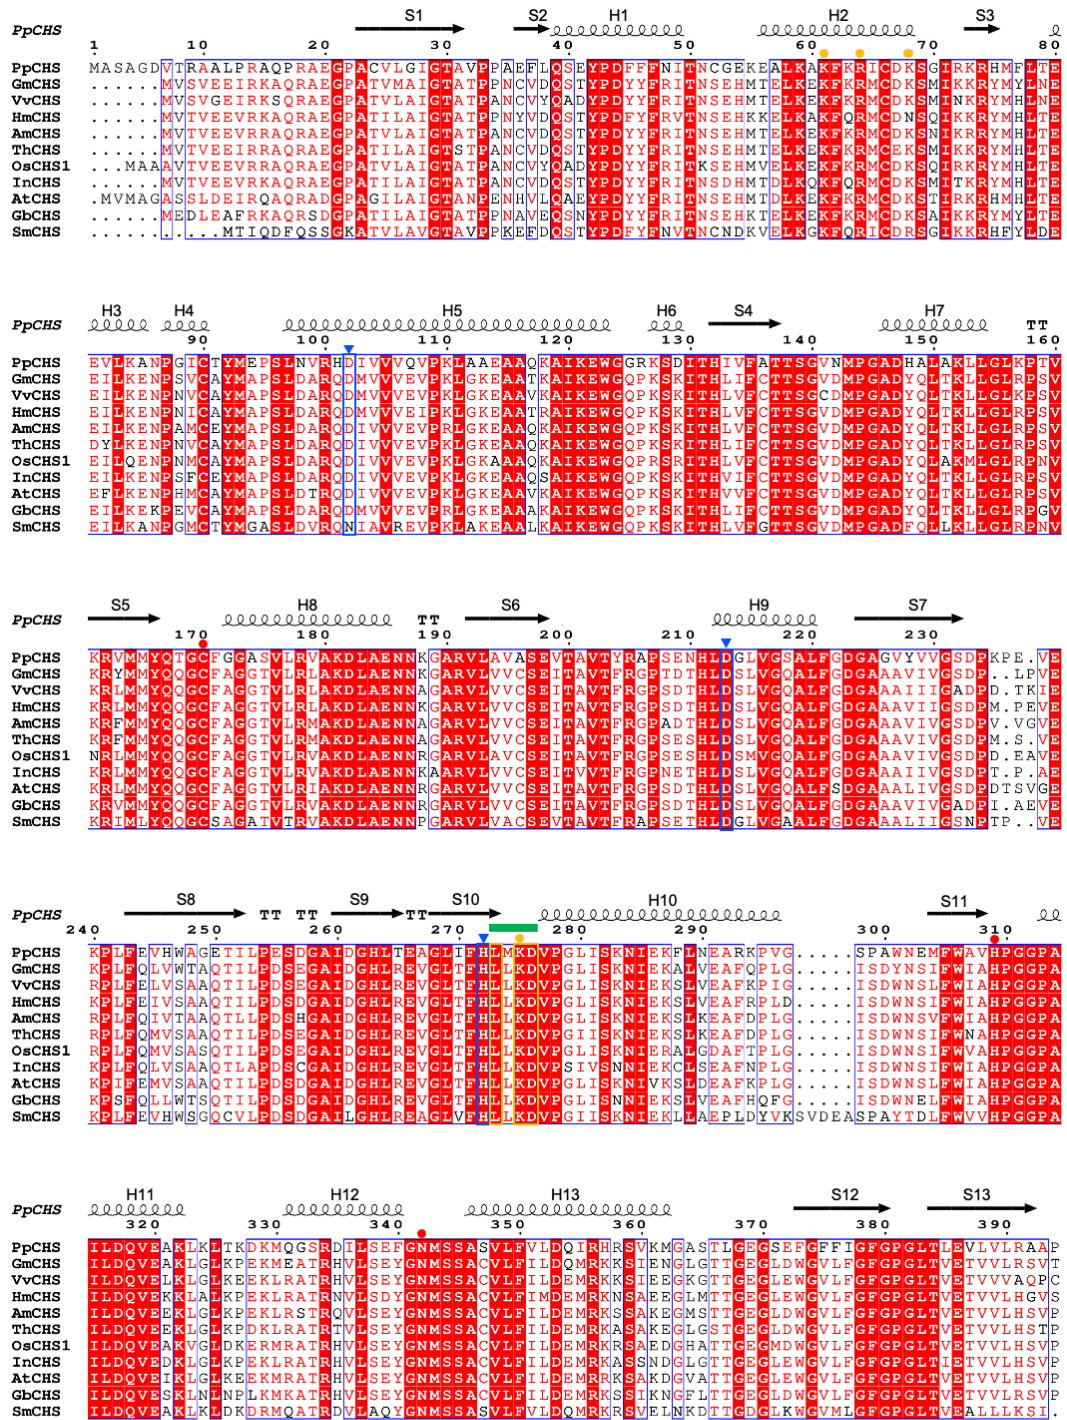

Supplementary Fig. 5 to be continued on the following page.

**Supplementary Fig. S5. Amino acid sequence alignment of CHS proteins.** CHS sequences from the following species are shown: *Glycine max* CHS1 (GmCHS, GenBank: X54644), *Vitis vinifera* (VvCHS, Phytozome v12.1: GSVIVT01032968001), *Hydrangea macrophylla* (HmCHS, GenBank: AB011467), *Antirrhinum majus* (AmCHS, GenBank: X03710), *Torenia* hybrid cultivar (ThCHS, GenBank: AB012923), *Oryza sativa* CHS1 (OsCHS, Phytozome v12.1: LOC\_Os11g32650), *Ipomoea nil* CHS-D (InCHS, GenBank: AB001818), *Arabidopsis thaliana* CHS (TRANSPARENT TESTA 4; AtCHS, Phytozome v12.1: AT5G13930), *Ginkgo biloba* (GbCHS, GenBank: AY647263), and *Selaginella moellendorffii* (SmCHS, Phytozome v12.1: 270496). Secondary structural elements of PpCHS are shown and labeled above the sequence. Strict  $\beta$ -turns are indicated as TT. Red columns with white letters highlight residues identical to those in PpCHS; white columns with red letters indicate similar residues. Blue triangles mark residues in PpCHS (Asp102<sup>PpCHS</sup>, Asp213<sup>PpCHS</sup>, and His272<sup>PpCHS</sup>) that interact via polar interactions with the lysine triad of PpCHIL. A thick green line indicates the K-loop (Leu273<sup>PpCHS</sup>–Asp276<sup>PpCHS</sup>). Orange circles mark residues involved in CoA binding in the PpCHS–CoA complex (Lys61<sup>PpCHS</sup>, Arg64<sup>PpCHS</sup>, Lys68<sup>PpCHS</sup>, and Lys275<sup>PpCHS</sup>). Red circles indicate putative catalytic residues (Cys170<sup>PpCHS</sup> and Asn342<sup>PpCHS</sup>).

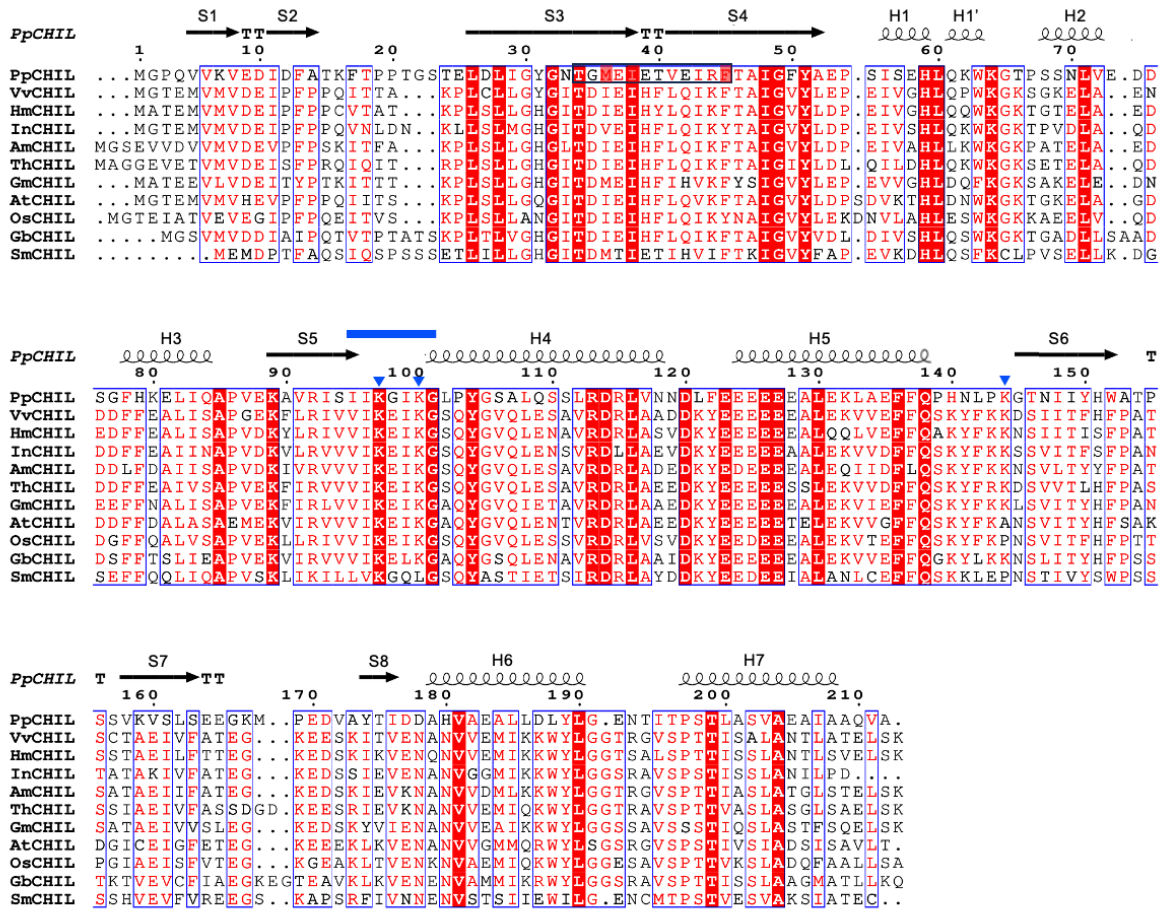

**Supplementary Fig. 6. Amino acid sequence alignment of CHIL proteins.** CHIL sequences from the following species are included: *Physcomitrella patens* (PpCHIL (PpCHIL-B)), *Vitis vinifera* (VvCHIL), *Hydrangea macrophylla* (HmCHIL), *Ipomoea nil* (InCHIL), *Antirrhinum majus* (AmCHIL), *Torenia hybrid cultivar* (ThCHIL (ThCHIL-A)), *Glycine max* (GmCHIL), *Arabidopsis thaliana* (AtCHIL), *Oryza sativa* (OsCHIL (OsCHIL-A)), *Ginkgo biloba* (GbCHIL), and *Selaginella moellendorffii* (SmCHIL). Secondary structural elements of PpCHIL are indicated above the alignment. H and S denote  $\alpha$ -helices and  $\beta$ -strands, respectively; H1' indicates a  $3_{10}$ -helix; and strict  $\beta$ -turns are labeled as TT. Red columns with white letters highlight residues identical to those in PpCHIL; white columns with red letters indicate similar residues. The  $\beta$ HP region of PpCHIL is boxed. Blue triangles mark the lysine triad (Lys97<sup>PpCHIL</sup>, Lys100<sup>PpCHIL</sup>, and Lys144<sup>PpCHIL</sup>) involved in polar interactions with PpCHS. A thick blue line above the sequence marks the loop region containing two highly conserved Lys residues (Lys97<sup>PpCHIL</sup> and Lys100<sup>PpCHIL</sup>). For CHIL sequence accession numbers, see reference<sup>11</sup>.

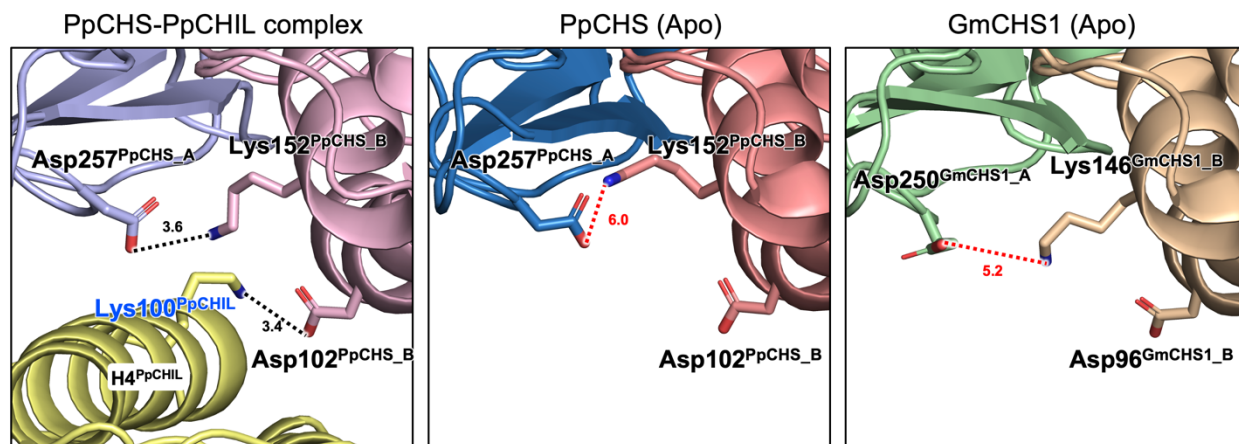

**Supplementary Fig. 7. Formation of inter-subunit salt bridge between Asp257<sup>PpCHS\_A</sup> and Lys152<sup>PpCHS\_B</sup> in PpCHS–PpCHIL.** There are no polar interactions in the corresponding positions of apo PpCHS (center panel) and apo GmCHS1 (right panel, PDB: 7BUR).

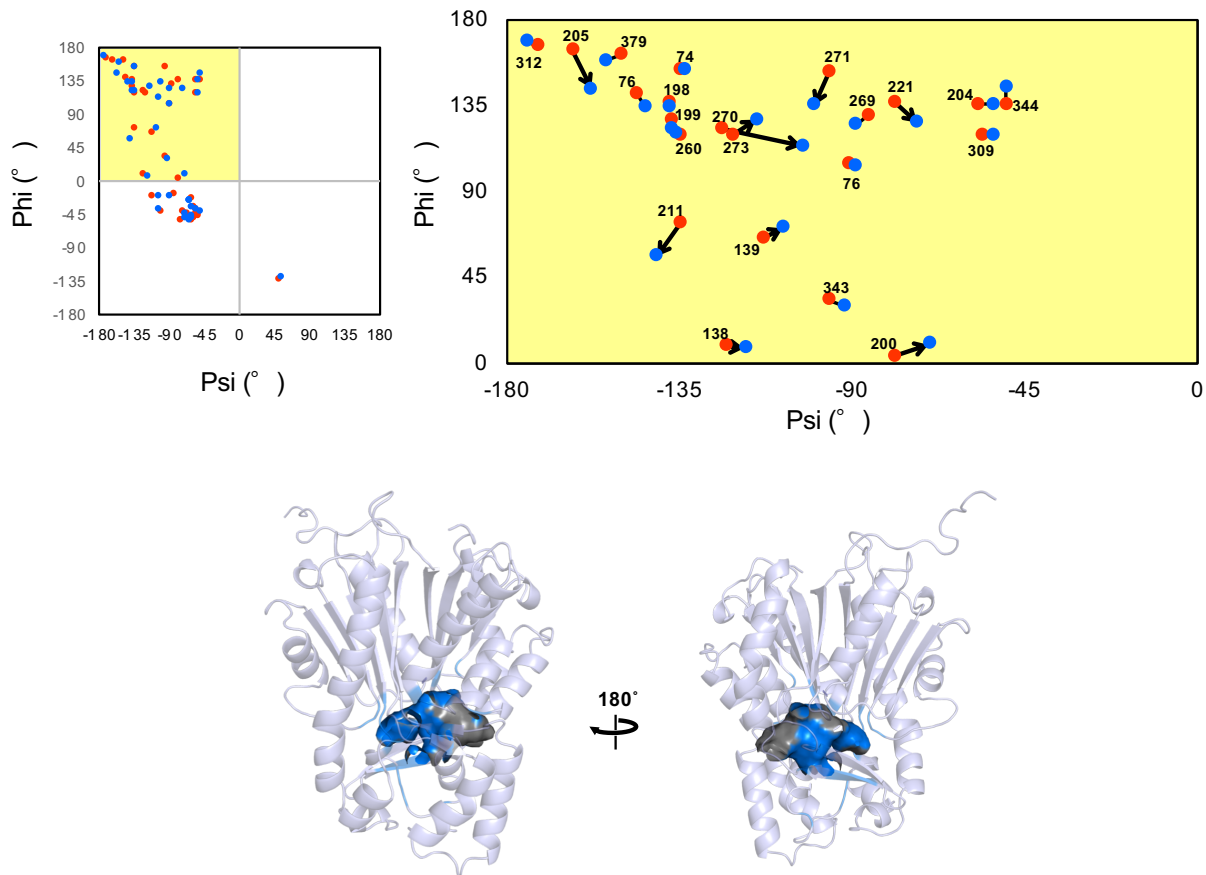

**Supplementary Fig. 8. Structural changes in the active-site cavity.** Top panels: Ramachandran plots for active-site cavity residues (blue: PpCHS–PpCHIL; red: PpCHS–CoA). An enlarged view of a specific region from the top-left Ramachandran plot is shown in the right panel. Bottom panel: The residues corresponding to the enlarged region (top right panel) are highlighted in blue on a surface representation of the active-site cavity.

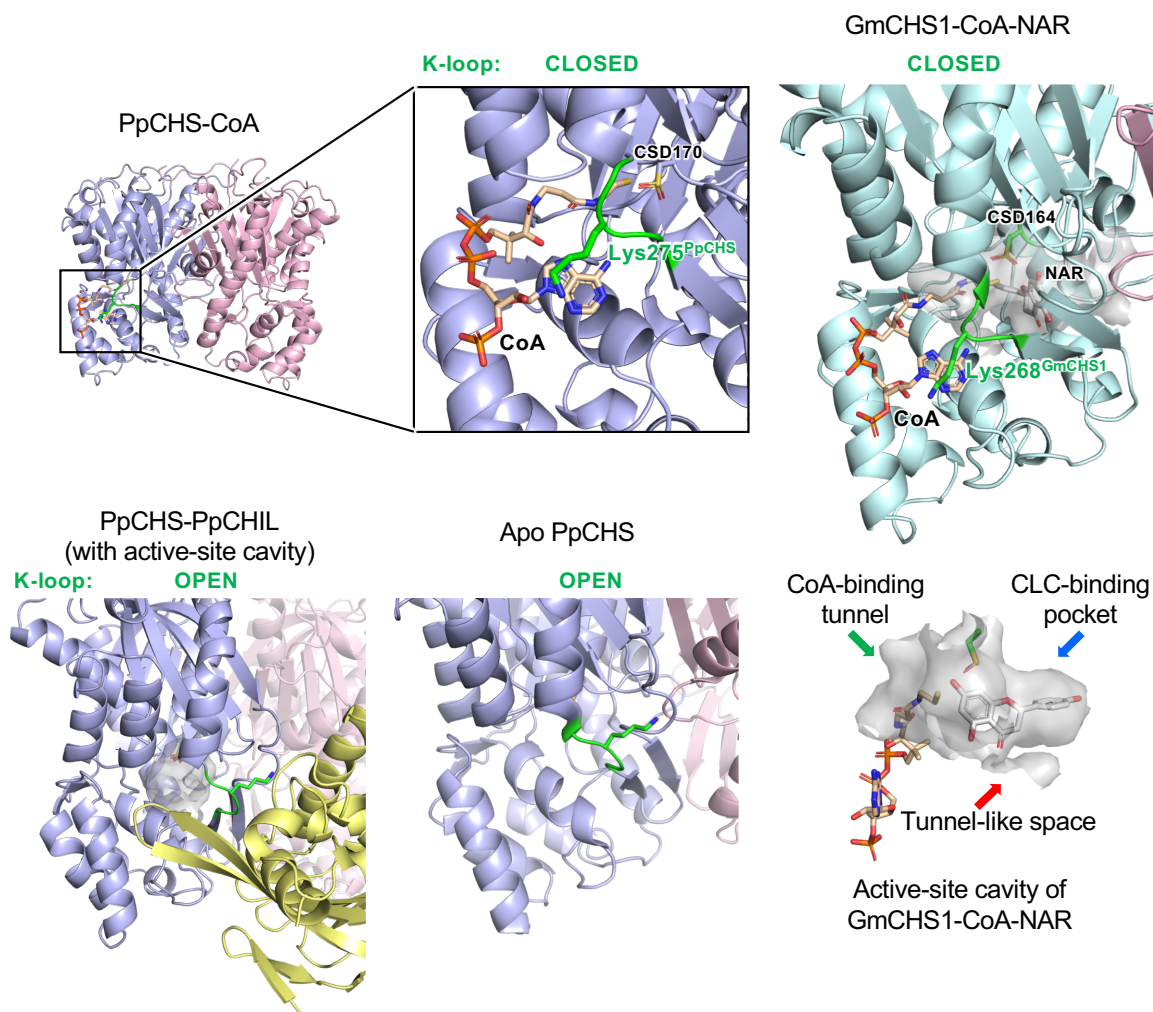

**Supplementary Fig. 9. Comparison of K-loop conformations across various CHS structures.** The K-loop with Lys275 (sticks) is colored green. Top panels: Crystal structures of PpCHS–CoA (left and center) and GmCHS1–CoA–Naringenin (NAR) (right, PDB: 8JRD) are compared. The active-site cavity is presented as a gray surface on the right panel. Bound CoA and NAR molecules are presented as sticks. Bottom panels: Structures of PpCHS–PpCHIL with its active-site cavity (left) and apo PpCHS (center, PDB: 6DX7). Right: Active-site cavity (gray surface representation) of GmCHS1–CoA–NAR viewed from a different perspective than the top right panel. Arrows indicate the CoA-binding tunnel, CLC-binding pocket, and a tunnel-like space.

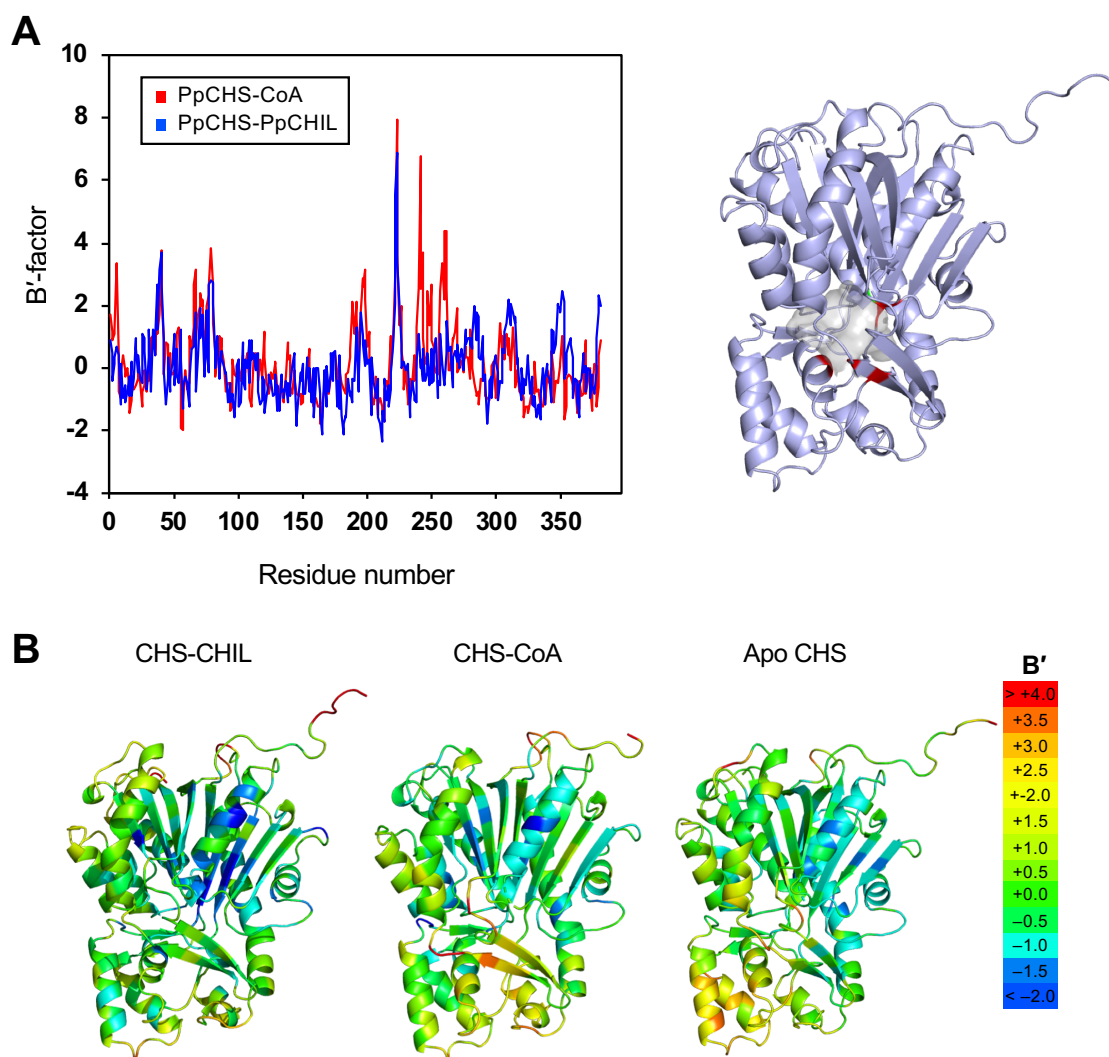

**Supplementary Fig. 10. CoA binding enhances the mobility of both the K-loop and the surrounding CLC-binding pocket in CHS.**

(A) Left: Normalized B-factor (B'-factor) profiles comparing PpCHS-CoA (red) and PpCHS-PpCHIL (blue) structures. Right: Monomeric PpCHS-CoA structure with the active-site cavity shown as a transparent surface. Residues with elevated B'-factors in the vicinity of the CLC-binding pocket are colored red. (B) B'-factor heat maps of PpCHS in the PpCHS-PpCHIL (left), PpCHS-CoA (center), and apo PpCHS (right) states.

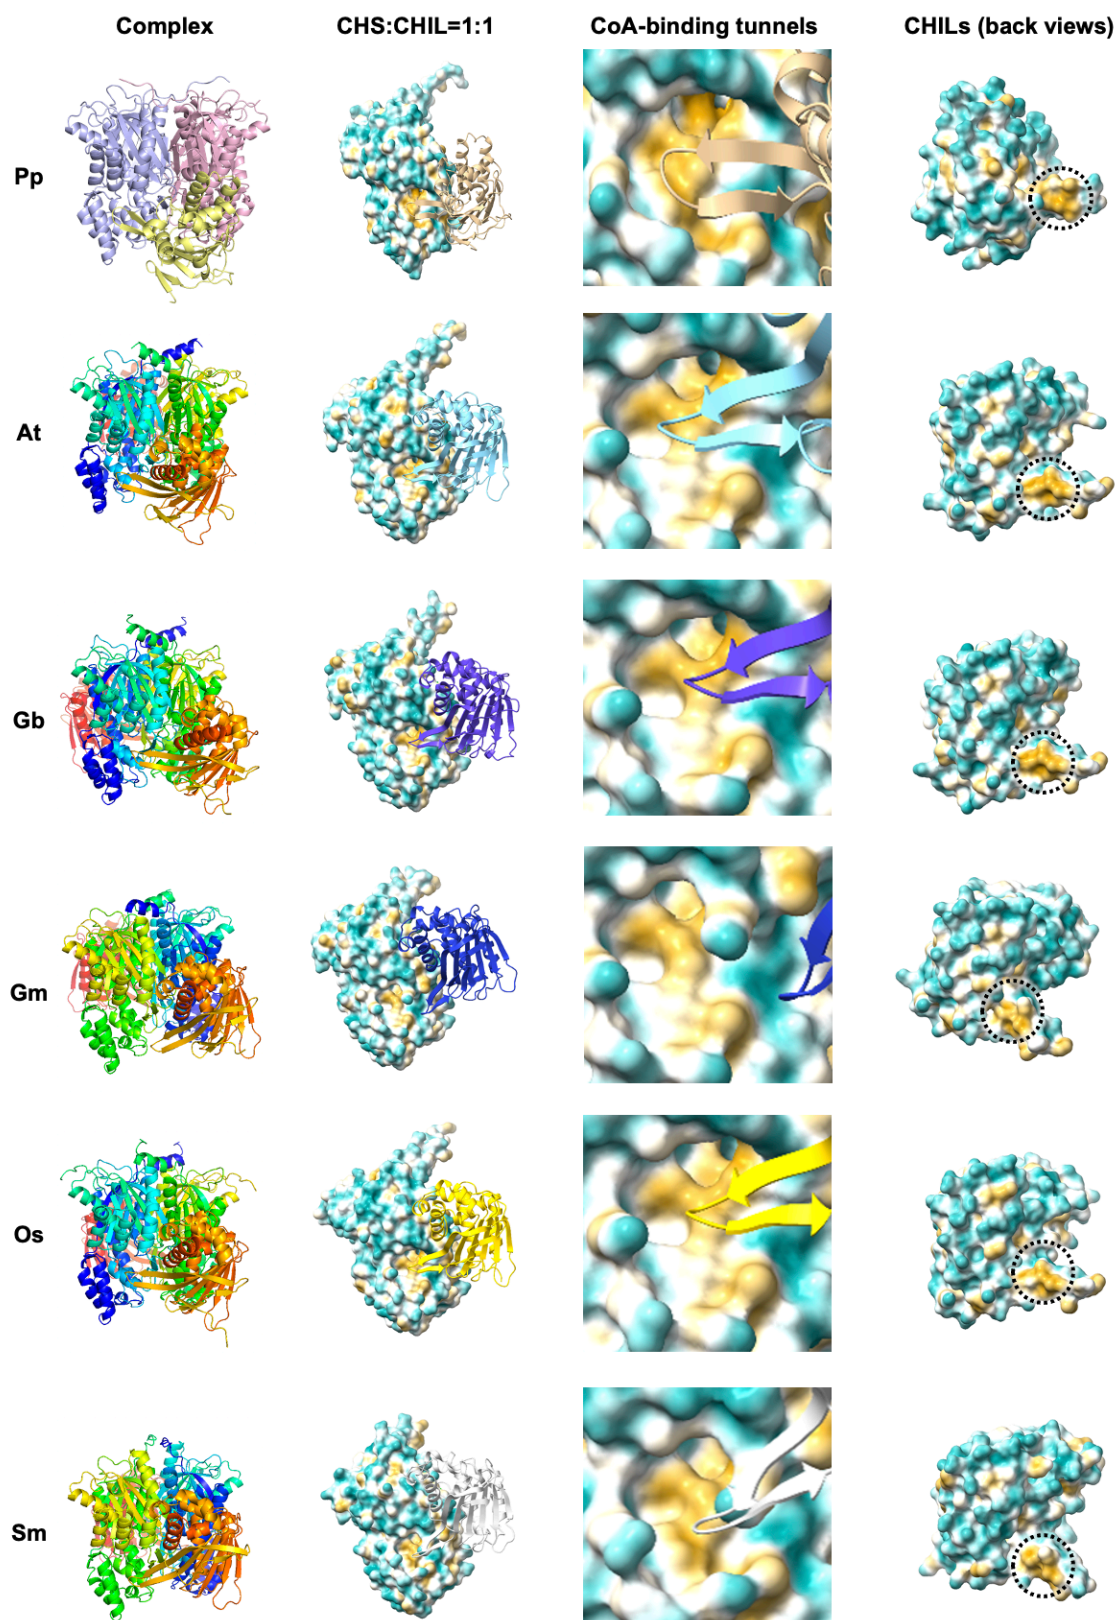

Supplementary Fig. 11 to be continued on the following page.

**Supplementary Fig. 11. Computational docking study of the CHS-CHIL complex.** Calculated CHS and CHIL complex structures in various land plants. Topological relationships between CHSs and CHILs in the complexes are similar among land plants, whereas the hydrophobic properties of CoA-binding tunnels (colored as shown in fig. S4A) and  $\beta$ HP positions vary. Dotted circles on the right indicate hydrophobic patches in  $\beta$ HPs of CHILs approaching CHSs. Pp: *Physcomitrella patens*; At: *Arabidopsis thaliana*; Gb: *Ginkgo biloba*; Gm: *Glycine max*; Os: *Oryza sativa*; Sm: *Selaginella moellendorffii*.

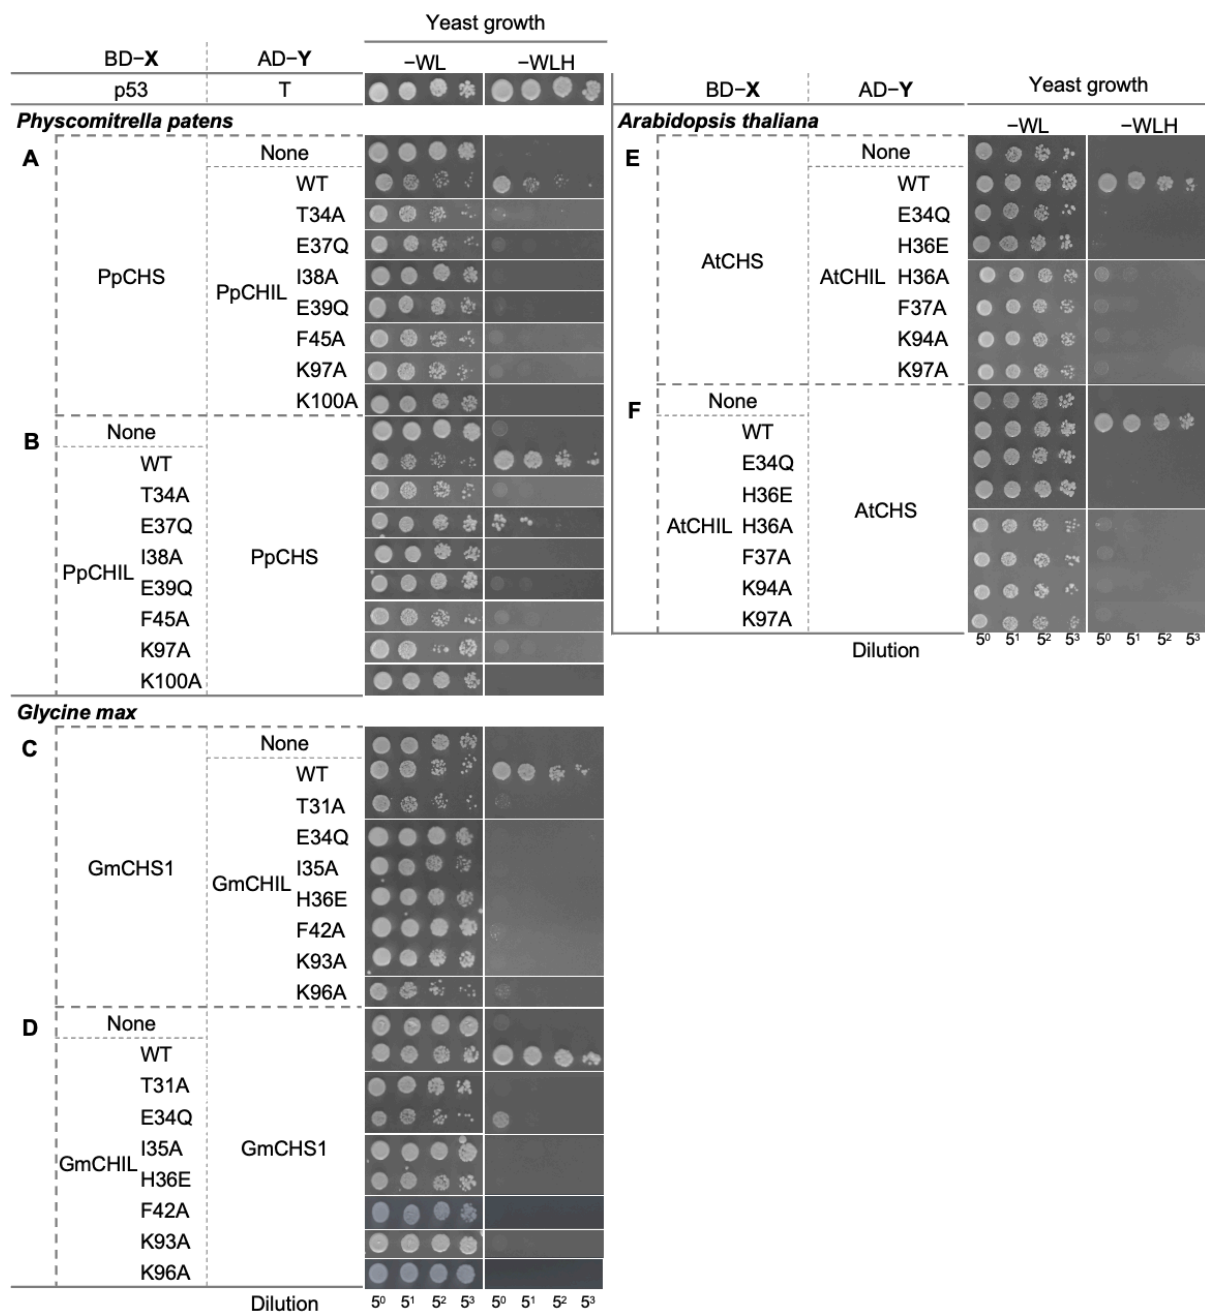

**Supplementary Fig. 12. Mutational analysis of CHIL-CHS interactions in *Physcomitrella patens* (A, B), *Glycine max* (C, D), and *Arabidopsis thaliana* (E, F).** Binary interactions between CHIL (wild-type and mutants) and CHS were analyzed using a GAL4-based yeast two-hybrid system<sup>30</sup>. Yeast cells co-expressing CHIL and CHS fused to the activation domain (AD; AD-Y columns) or DNA-binding domain (BD; BD-X columns) of GAL4 were spotted onto selective media. Growth on -WLH medium (lacking tryptophan, leucine, and histidine) indicates a positive interaction. (A, B) BD- or AD-tagged PpCHS was co-expressed with AD- or BD-tagged PpCHIL or its mutants; “None” indicates AD or BD alone. (C, D) BD-GmCHS1 or AD-GmCHS1 was co-expressed with AD- or BD-tagged GmCHIL or its mutants. (E, F) BD-AtCHS or AD-AtCHS was co-expressed with AD- or BD-tagged AtCHIL or its mutants. For each condition, 5  $\mu$ L of a 5-fold serial dilution of yeast suspension was spotted onto synthetic dropout agar plates: -WL (lacking tryptophan and leucine) and -WLH.

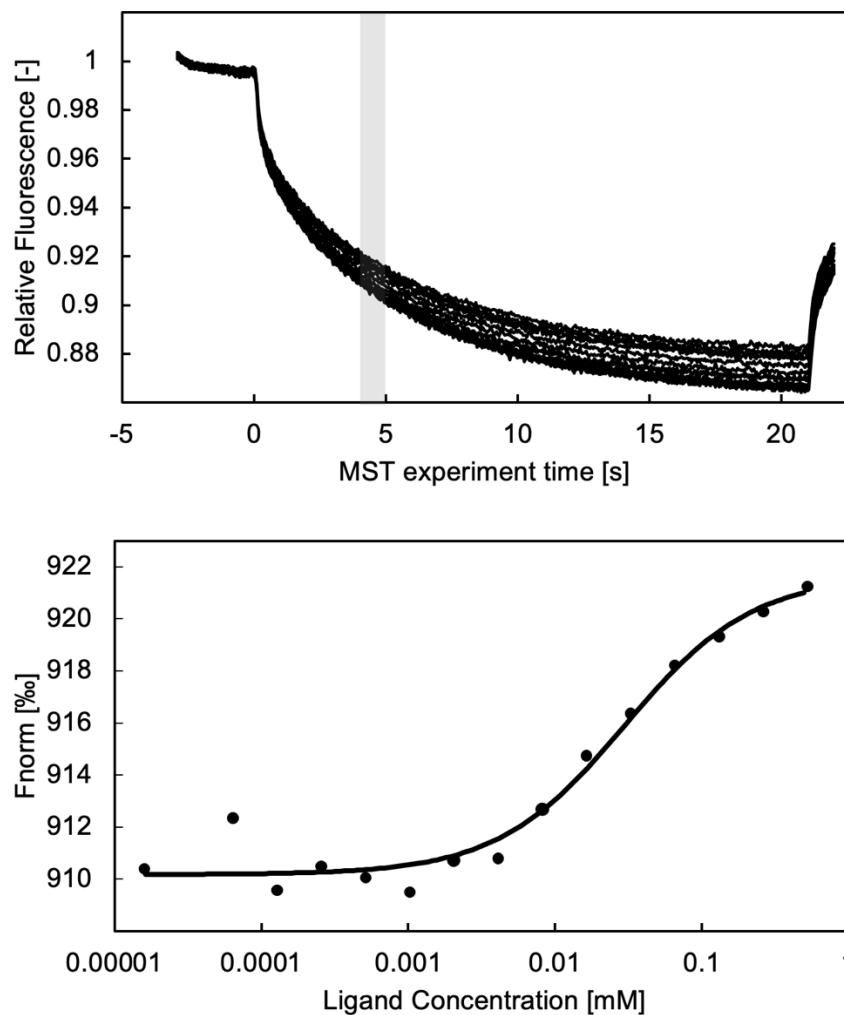

**Supplementary Fig. 13. Interaction between PpCHS and PpCHIL according to a microscale thermophoresis analysis.** Upper panel: The interaction between PpCHIL and PpCHS was monitored using fluorescent molecular signals labeled on PpCHS. The fluorescent signal traces of PpCHIL titration are shown. Lower panel: Fitting of the change in the fluorescence signal ( $F_{\text{norm}}$ ) using the Hill equation is shown. Fluorescent signal changes during the time indicated by a gray rectangle (upper panel) were used for calculations.

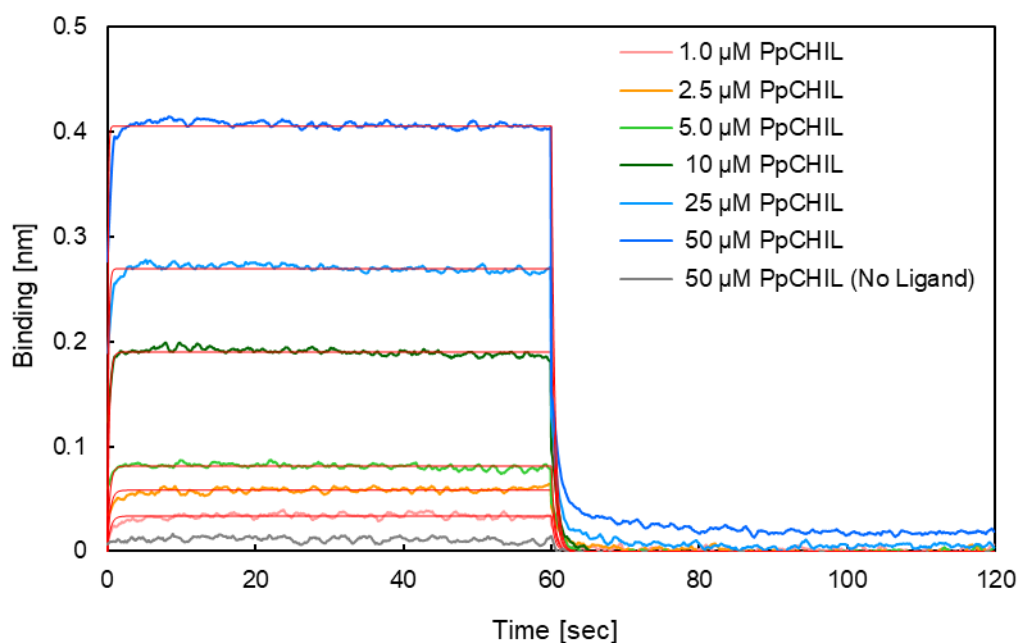

**Supplementary Fig. 14. Biolayer interferometry analysis of interaction between PpCHS and PpCHIL.** Binding of His<sub>6</sub>-PpCHIL to immobilized biotinylated His<sub>6</sub>-Avi-PpCHS was analyzed by biolayer interferometry using the Octet R2 system. Streptavidin biosensors were loaded with biotinylated PpCHS, followed by incubation with increasing concentrations of His<sub>6</sub>-PpCHIL (1.0 to 50  $\mu$ M). Sensorgrams show the association phase (0–60 s) and dissociation phase (60–120 s). Control data obtained using biosensors without immobilized PpCHS (50  $\mu$ M PpCHIL, gray) are shown as the negative control.

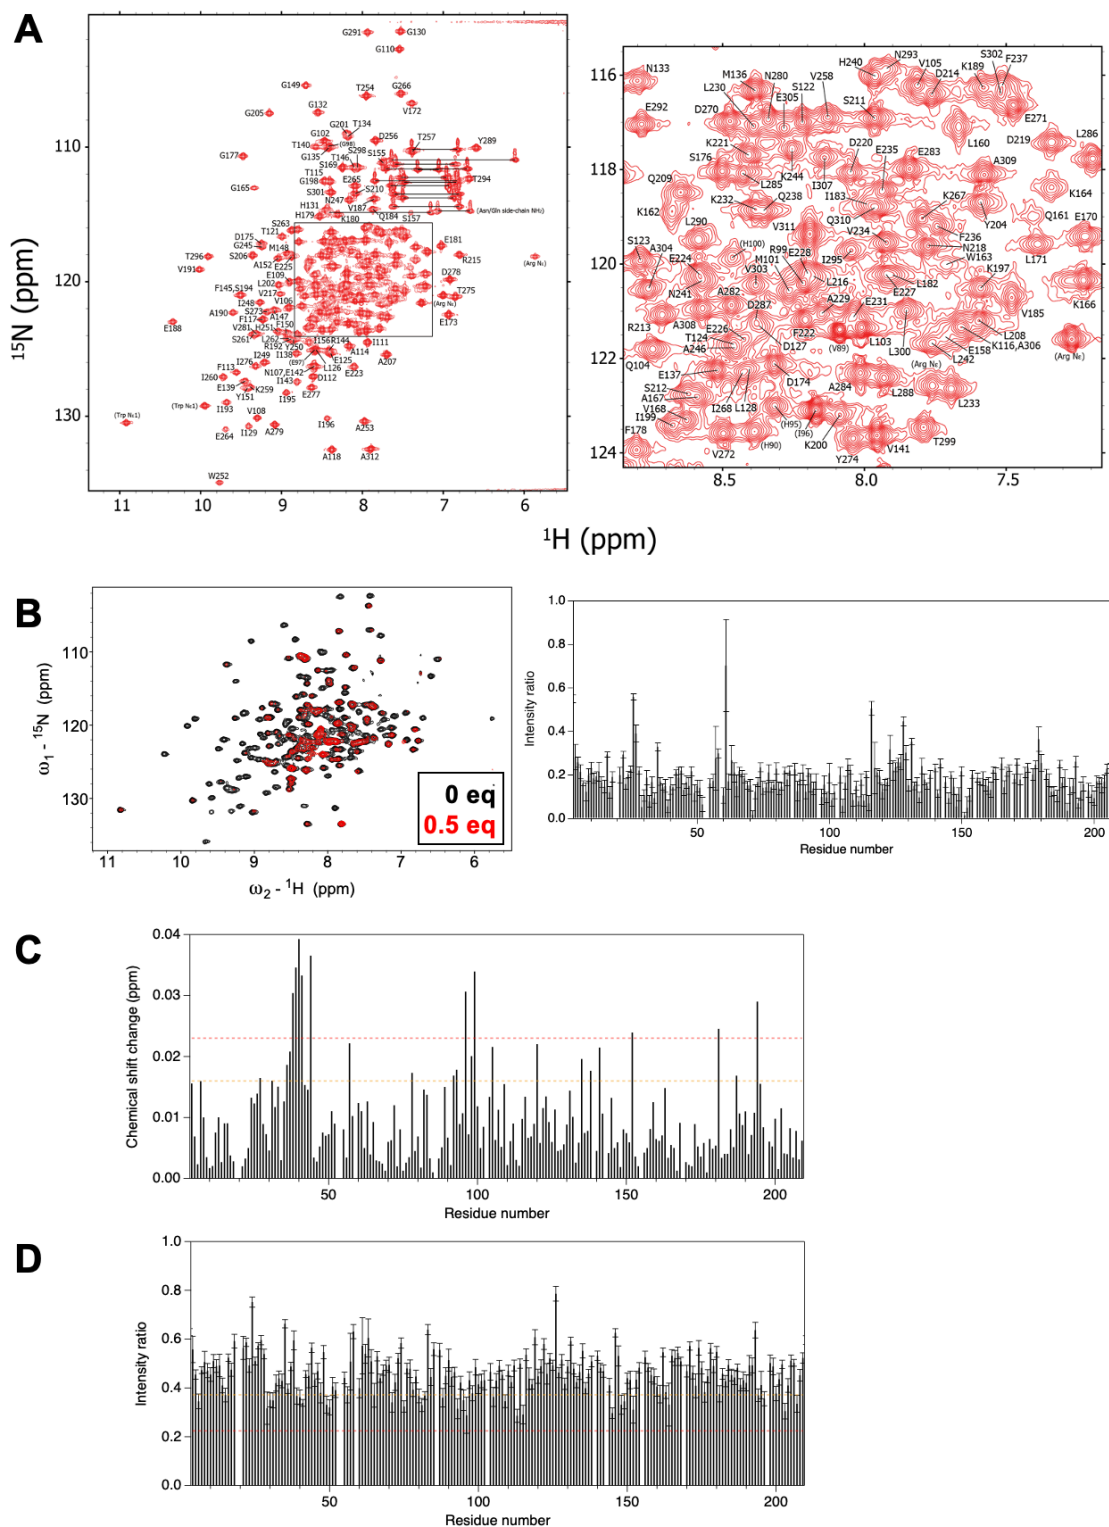

**Supplementary Fig. 15. NMR analysis of the interaction between PpCHS and PpCHIL.** (A) Left panel:  $^1\text{H}$ - $^{15}\text{N}$  HSQC spectra of  $^{13}\text{C}$ - and  $^{15}\text{N}$ -labeled PpCHIL. Right panel: Close-up view of the square in the left panel. The assigned amino acid residues (one-letter notation) of PpCHIL are

Supplementary Fig. 15 to be continued on the following page.

labeled. **(B)**  $^1\text{H}$ - $^{15}\text{N}$  HSQC spectra of  $^{15}\text{N}$ -labeled PpCHIL in the absence (black) and presence (red) of 0.5 equivalents of PpCHS under 0 mM NaCl conditions. Fold-changes of signal intensities after the titration of PpCHS is shown on the right. **(C)** Chemical shift changes in the titration experiment involving PpCHS under 50 mM NaCl conditions. The cutoffs of the chemical shift perturbation mapping in Fig. 3C are shown as a dotted orange line ( $\Delta\delta_{\text{ave}} + \Delta\delta_{\text{SD}}$ ) and a dotted red line ( $\Delta\delta_{\text{ave}} + 2\Delta\delta_{\text{SD}}$ ), where  $\Delta\delta_{\text{ave}}$  and  $\Delta\delta_{\text{SD}}$  are the average and standard deviation, respectively, of the chemical shift change following the addition of the ligand. **(D)** Fold-changes of signal intensities ( $I$ ) in the titration experiment shown in Fig. 3C. Dotted lines represent  $(I_{0.5\text{eq}}/I_{0\text{eq}})_{\text{ave}} + (I_{0.5\text{eq}}/I_{0\text{eq}})_{\text{SD}}$  (orange) and  $(I_{0.5\text{eq}}/I_{0\text{eq}})_{\text{ave}} + 2(I_{0.5\text{eq}}/I_{0\text{eq}})_{\text{SD}}$  (red) of the intensity ratio in this experiment.

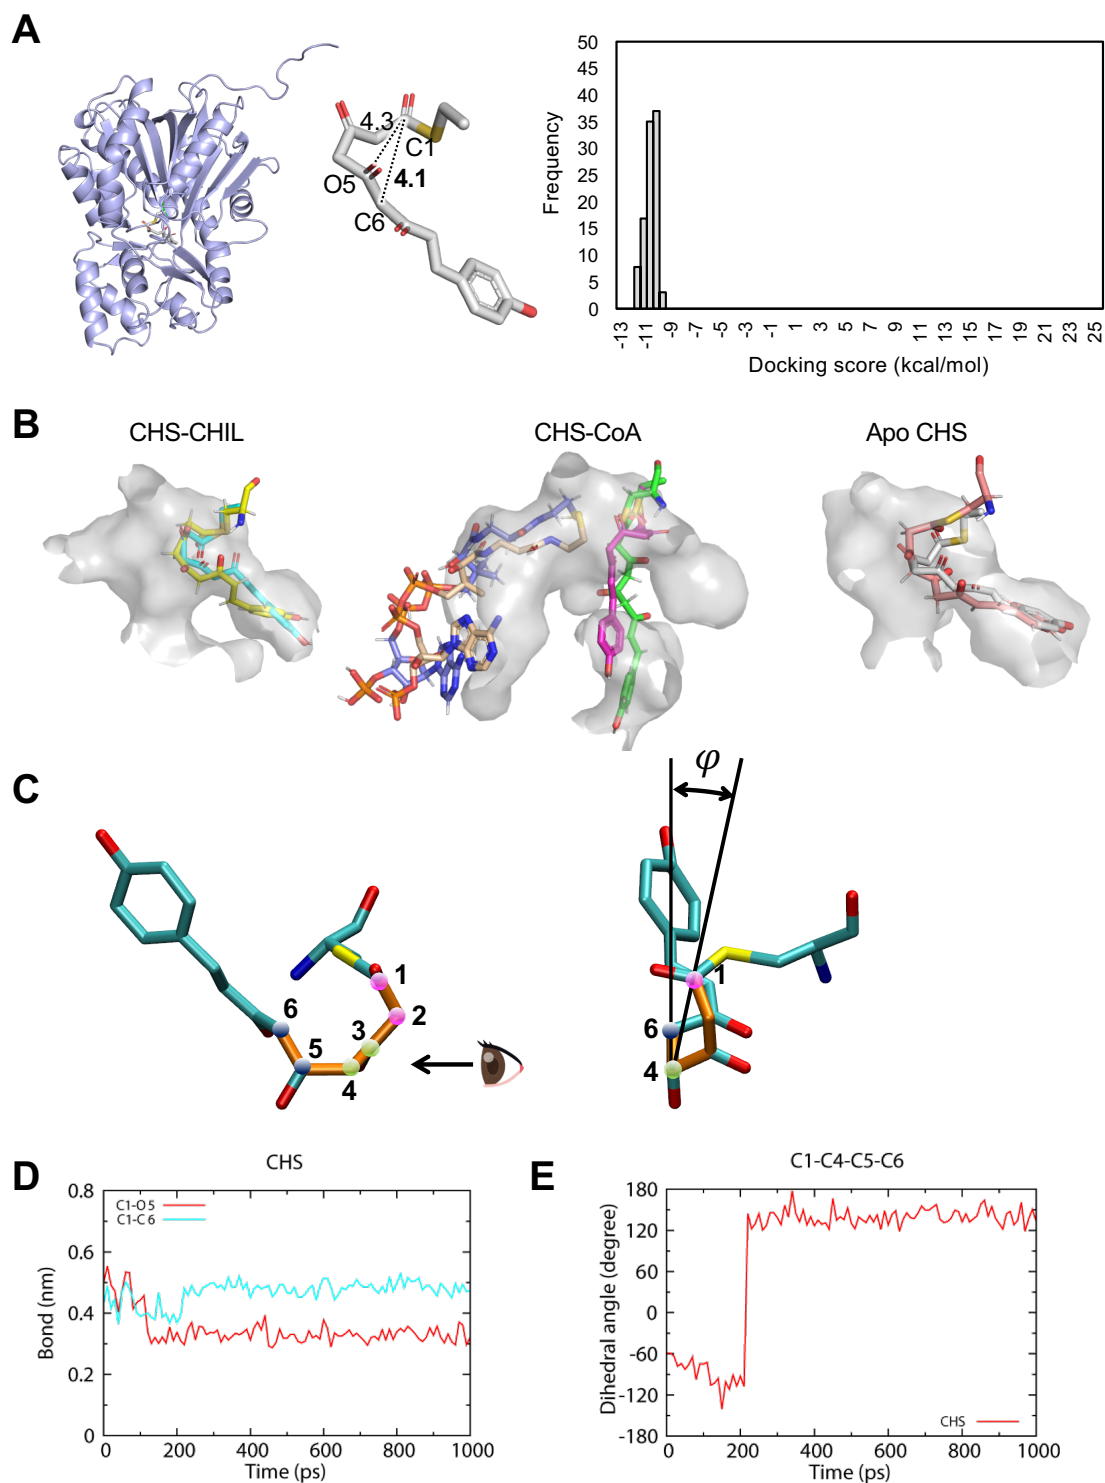

**Supplementary Fig. 16. Computational simulations of T-i conformational dynamics.** (A) Conformation of covalently bound T-i (center) and its associated docking scores (right) from covalent docking with apo PpCHS (PDB: 6DX7). (E) Comparison of initial and final T-i

conformations from 1,000-ps MD simulations of PpCHS. Initial T-i models are colored as in Fig. 4AB and Fig. S16A. Final T-i conformations are depicted with hydrogens (left: yellow-based stick; center: green-based stick; right: pink-based stick). The initial CoA model is colored as in Fig. 2B, with the final model shown as a blue-based stick with hydrogens. (C) Schematic illustration of dihedral angle ( $\varphi$ ) analysis. T-i carbon atoms (C1-C6) are shown as spheres, colored as in Fig. 1. The right-hand T-i view corresponds to the perspective indicated by the eye in the left diagram. A  $0^\circ$  angle ( $\varphi$ ) indicates optimal conditions for C6–C1 Claisen cyclization. (D) Time-dependent changes in the C6–C1 (blue) and O5–C1 (red) distances during a 1,000-ps molecular dynamics (MD) simulation of apo PpCHS. (E) Dihedral angle analysis of T-i carbon atoms (C1-C4-C5-C6) in apo PpCHS.

## Supplementary Tables

**Supplementary Table 1. Data and refinement statistics for crystal structures**

|                                        | PpCHS-PpCHIL          | PpCHIL                  | PpCHS-CoA                 |
|----------------------------------------|-----------------------|-------------------------|---------------------------|
| Data collection                        |                       |                         |                           |
| Space group                            | <i>P1</i>             | <i>C2</i>               | <i>P21212</i>             |
| Cell dimensions                        |                       |                         |                           |
| <i>a</i> , <i>b</i> , <i>c</i> (Å)     | 79.9, 88.9, 118.0     | 61.5, 45.9, 76.3        | 190.2, 199.0, 68.4        |
| $\alpha$ , $\beta$ , $\gamma$ (°)      | 74.4, 74.3, 68.8      | 90, 113.2, 90           | 90, 90, 90                |
| Resolution (Å)*                        | 50.0-1.92 (2.04-1.92) | 50.0-1.87 (1.98 - 1.87) | 50.0 - 2.64 (2.80 - 2.64) |
| Observed reflections                   | 624,785 (102,663)     | 277,448 (41,842)        | 892,976 (137,670)         |
| Unique reflections                     | 216,275 (34,942)      | 16,352 (2,546)          | 76,561 (12,150)           |
| $R_{\text{meas}}$ ( $R_{\text{rim}}$ ) | 0.17 (1.13)           | 0.45 (6.02)             | 0.39 (1.80)               |
| $\langle I/\sigma(I) \rangle$          | 5.16 (1.01)           | 10.8 (1.15)             | 7.82 (1.75)               |
| CC <sub>1/2</sub> (%)                  | 98.6 (61.0)           | 99.7 (58.2)             | 96.8 (53.5)               |
| Completeness (%)                       | 98.9 (99.1)           | 99.8 (99.9)             | 99.0 (98.7)               |
| Redundancy                             | 2.89 (2.94)           | 17.0 (16.4)             | 11.7 (11.3)               |
| Refinement                             |                       |                         |                           |
| Resolution (Å)                         | 43.4-1.92             | 35.5-1.87               | 48.13 – 2.64              |
| $R_{\text{factor}}/R_{\text{free}}$    | 0.17 / 0.21           | 0.19 / 0.23             | 0.20 / 0.24               |
| Number of atoms                        |                       |                         |                           |
| Protein                                | 18,347                | 1,633                   | 17,518                    |
| Ligand/ion                             | 26                    | 21                      | 208                       |
| Water                                  | 2,644                 | 136                     | 323                       |
| Average B factors                      |                       |                         |                           |
| Protein                                | 34.6                  | 25.3                    | 34.0                      |
| Ligand/ion                             | 51.2                  | 54.1                    | 45.6                      |
| Water                                  | 42.6                  | 34.1                    | 27.2                      |
| Rmsds bond length/bond angle           |                       |                         |                           |
| Bond length (Å)                        | 0.007                 | 0.006                   | 0.012                     |
| Bond angle (°)                         | 0.963                 | 0.823                   | 1.345                     |
| Ramachandran plot                      |                       |                         |                           |
| Most favored (%)                       | 97.7                  | 99.5                    | 97.4                      |
| Additionally allowed (%)               | 2.3                   | 0.5                     | 2.6                       |
| PDB entry                              | 9KAH                  | 9KAI                    | 9KAJ                      |

\*Values in parentheses are for the highest resolution shell.

$$^{\dagger}R_{\text{meas}} = R_{\text{rim}} = \sum_{hkl} (N/N - 1)^{1/2} \sum_i |I_i(hkl) - \langle I(hkl) \rangle| / \sum_{hkl} \sum_i I_i(hkl)$$

**Supplementary Table 2. Kinetic and thermodynamic parameters of PpCHS–PpCHIL interaction**

| Method           | $k_{\text{on}}$ ( $\text{s}^{-1}\text{M}^{-1}$ ) | $k_{\text{off}}$ ( $\text{s}^{-1}$ ) | $K_{\text{d}}$ ( $\mu\text{M}$ ) |
|------------------|--------------------------------------------------|--------------------------------------|----------------------------------|
| MST <sup>*</sup> |                                                  |                                      | $31.8 \pm 1.5$                   |
| BLI <sup>†</sup> | $1.68 \times 10^5$                               | 2.16                                 | $12.8 \pm 0.7$                   |

<sup>\*</sup> MST, Microscale thermophoresis. Buffer used for measurements was 20 mM HEPES-NaOH (pH 7.0) containing 150 mM NaCl and 0.1% (w/v) Tween 20.

<sup>†</sup> BLI, Biolayer interferometry. Buffer used for measurements was 100 mM HEPES-KOH (pH 7.5) containing 0.1% (w/v) bovine serum albumin.

**Supplementary Table 3. Kinetic parameters of PpCHS-catalyzed THC production**

| CHIL                                     | $k_{\text{cat}}$ ( $\text{s}^{-1}$ )         | $K_{\text{m}}$ ( $\mu\text{M}$ ) | $k_{\text{cat}}/K_{\text{m}}$ ( $\text{s}^{-1} \text{M}^{-1}$ ) |
|------------------------------------------|----------------------------------------------|----------------------------------|-----------------------------------------------------------------|
| For <i>p</i> -coumaroyl-CoA <sup>*</sup> |                                              |                                  |                                                                 |
| –                                        | $2.63 \times 10^{-3} \pm 8.5 \times 10^{-5}$ | $3.80 \pm 0.59$                  | $6.9 \times 10^2$                                               |
| +                                        | $6.40 \times 10^{-2} \pm 6.5 \times 10^{-3}$ | $25.9 \pm 5.5$                   | $2.5 \times 10^3$                                               |
| For malonyl-CoA <sup>†</sup>             |                                              |                                  |                                                                 |
| –                                        | $3.45 \times 10^{-3} \pm 3.1 \times 10^{-4}$ | $1.46 \pm 0.86$                  | $2.4 \times 10^2$                                               |
| +                                        | $6.84 \times 10^{-2} \pm 3.3 \times 10^{-3}$ | $18.4 \pm 2.8$                   | $3.7 \times 10^3$                                               |

<sup>\*</sup> 100  $\mu\text{M}$  malonyl-CoA was used as the extender substrate.

<sup>†</sup> 50  $\mu\text{M}$  *p*-coumaroyl-CoA was used as the starter substrate.

**Supplementary Table 4. List of oligonucleotide primers used in this study**

| Mutant        | Primer name | Sequence (5'→3') *                             |
|---------------|-------------|------------------------------------------------|
| <b>PpCHIL</b> |             |                                                |
|               | CDS-f       | TGATCTCAGAGGAGGACCTGCATATGGGTCTCCAAGTTGTG      |
|               | CDS-r       | TGCGGCCGCTGCAGGTCGACGGATCCTCATGCAACCTGGGCAG    |
| T34A          | T34A-f      | ATGGCAACGCGGGAATGGAGATTGAG                     |
|               | T34A-r      | CATTCCCGCGTTGCCATGGCCG                         |
| E37Q          | E37Q-f      | <u>CAGATTGAGACTGTGGA</u> AATCAGGTTTA           |
|               | E37Q-r      | CATTCCCGTGTGGCCATG                             |
| I38A          | I38A-f      | TCGGCCATGGCAACACGGGAATGGAGG <u>CT</u> GAGACTGT |
|               |             | GGAAATCAGGTTTAC                                |
|               | I38A-r      | TCCCGTGTGGCCATGGCCG                            |
| E39Q          | E39Q-f      | <u>CAGACTGTGGA</u> AATCAGGTTTACTGC             |
|               | E39Q-r      | AATCTCCATTCCCGTGTG                             |
| F45A          | F45A-f      | AATCAGGGCTACTGCCATGGGCTTCTAC                   |
|               | F45A-r      | ATGGCAGT <u>AG</u> CCCTGATTTCACAGTCTCAATC      |
| K97A          | K97A-f      | CATCATCGCAGGGATCAAGGGCTC                       |
|               | K97A-r      | GATCCCTGCGATGATGGAGATTGCGAC                    |
| K100A         | K100A-f     | TCTCCATCATCAAAGGGATCGCTGGCCTCCCCTATGGC         |
|               | K100A-r     | GATCCCTTTGATGATGGAG                            |
| <b>GmCHIL</b> |             |                                                |
|               | CDS-f       | CTCAGAGGAGGACCTGCATATGGCTACTGAAGAGGTTTTG       |
|               | CDS-r       | GCTGCAGGTCGACGGATCCTCACTTGGACAACCTCCTGC        |
| T31A          | T31A-f      | CTTTGCTTGCCATGGAATCGCCGACATGGAGATTCACTTCATC    |
|               | T31A-r      | GATGAAGTGAATCTCCATGTCGGCGATTCCATGGCCAAGCAAAG   |
| E34Q          | E34Q-f      | CATGGAATCACCGACATGCAGATTCACTTCATCCATGTGAAATTC  |
|               | E34Q-r      | GAATTTACATGGATGAAGTGAATCTGCATGTCGGTGATTCCATG   |
| I35A          | I35A-f      | GGAATCACCGACATGGAGGCTCACTTCATCCATGTGAAATTC     |
|               | I35A-r      | GAATTTACATGGATGAAGTGAAGCCTCCATGTCGGTGATTCC     |
| H36E          | H36E-f      | GAATCACCGACATGGAGATTGAGTTCATCCATGTGAAATTCTATTC |
|               | H36E-r      | GAATAGAATTTACATGGATGAACTCAATCTCCATGTCGGTGATTCC |
| F42A          | F42A-f      | GATTCATTCATCCATGTGAAAGCCTATTCAATCGGGGTTTATTG   |
|               | F42A-r      | CAAATAAACCCCGATTGAATAGGCTTTACATGGATGAAGTGAATC  |
| K93A          | K93A-f      | GAAGTTTATTAGACTTGTGGTGATCGCAGAGATCAAGGGTGCACAG |
|               | K93A-r      | CTGTGCACCCTTGATCTCTGCGATCACCACAAGTCTAATAAACTTC |
| K96A          | K96A-f      | CTTGTGGTGATCAAAGAGATCGCGGGTGCACAGTATGGGGTTC    |
|               | K96A-r      | GAACCCCATACTGTGCACCCGCGATCTCTTTGATCACCACAAG    |
| <b>AtCHIL</b> |             |                                                |
|               | CDS-f       | CTCAGAGGAGGACCTGCATATGGGAACAGAGATGGTCATG       |
|               | CDS-r       | GCTGCAGGTCGACGGATCCTTAGGTTAAACTGCGGAGATTG      |
| E34Q          | E34Q-f      | GCCAAGGGATCACAGACATTCAAATCCACTTTCTTCAAGTGAAG   |
|               | E34Q-r      | AATGTCTGTGATCCCTTGG                            |
| H36E          | H36E-f      | GCCAAGGGATCACAGACATTGAGATCGAATTCTTCA           |
|               |             | AGTGAAGTTCACTG                                 |
|               | H36E-r      | AATGTCTGTGATCCCTTGG                            |
| H36A          | H36A-f      | TTGAGATCGCCTTTCTTCAAGTGAAGTTCACTG              |
|               | H36A-r      | TGAAGAAAGCGCATCTCAATGTCTGTGATCCC               |
| F37A          | F37A-f      | GAGATCCACGCTCTTCAAGTGAAGTTCACTGC               |
|               | F37A-r      | CTTGAAGAGCGTGGATCTCAATGTCTGTGATC               |
| K94A          | K94A-f      | GTGGTGATAGCGGAGATAAAAGGAGCTCAGTACG             |
|               | K94A-r      | TTTATCTCCGCTATCACCACCACTCTTATAACCTTC           |
| K97A          | K97A-f      | AGGAGATAGCAGGAGCTCAGTACGGAGTG                  |
|               | K97A-r      | TGAGCTCCTGCTATCTCCTTTATCACCACCACTC             |

\* Underlining shows the mutation site.

## Supplementary Notes

### Supplementary Note 1

Our previous BLI measurements of CHS–CHIL interactions in various land plants, including *P. patens*, yielded  $K_d$  values ranging from 3 to 126 nM (11), which are substantially lower than those obtained in the present study. Upon investigation, we found that these earlier values could at least in part be explained by non-specific binding of the analyte protein (glutathione *S*-transferase–tagged CHIL) to the His<sub>6</sub>-CHS-immobilized biosensor. To resolve this issue, we refined the BLI assay system by immobilizing biotinylated His<sub>6</sub>–Avi–PpCHS onto a streptavidin-coated biosensor, using His<sub>6</sub>-tagged CHIL as the analyte, and including 0.1% (w/v) bovine serum albumin in the assay buffer to suppress non-specific interactions. The  $K_d$  value obtained using this improved BLI setup was consistent with those derived from MST analysis and the SEC results in the presence of 200 mM NaCl.

### Supplementary Note 2

A 1- $\mu$ s MD simulation of the Ti-bound PpCHS–PpCHIL complex revealed that the complex undergoes a transition from a tightly associated “closed” state, as seen in the crystal structure, to a more relaxed “open” state, characterized by a wider gap between the two proteins. This closed-to-open transition of the two proteins occurs near the  $\beta$ HP region, and the  $\beta$ HP becomes slightly more remote from PpCHS in the open conformation.
